# Supplementary material for: A polyphenol-rich cranberry extract protects from diet-induced obesity, insulin resistance and intestinal inflammation in association with increased Akkermansia spp. population in the gut microbiota of mice
Source: HighWire-hosted journal article supplement (doi:10.1136/gutjnl-2014-307142), 2014-07-30
Supplement: gutjnl-2014-307142supp_tables.pdf [file gutjnl-2014-307142supp_tables.pdf]

**Table S1. Relative abundance of genera in CHOW, HFHS and CE groups.**

|                 |                             | Relative abundance (%) |       |       |       |       |       |      |       |       |       |      |      |
|-----------------|-----------------------------|------------------------|-------|-------|-------|-------|-------|------|-------|-------|-------|------|------|
| Taxon<br>Phylum | Treatment<br>Week<br>Genus* | CHOW                   |       |       |       | HFHS  |       |      |       | CE    |       |      |      |
|                 |                             | 0                      | 1     | 5     | 9     | 0     | 1     | 5    | 9     | 0     | 1     | 5    | 9    |
| Actinobacteria  | <i>Propionibacterium</i>    | 0,00                   | 0,00  | 0,08  | 0,00  | 0,00  | 0,00  | 0,00 | 0,04  | 0,00  | 0,00  | 0,00 | 0,04 |
| Actinobacteria  | <i>Adlercreutzia</i>        | 0,04                   | 0,12  | 0,16  | 0,08  | 0,39  | 0,19  | 0,12 | 0,51  | 0,19  | 0,16  | 0,23 | 0,23 |
| Bacteroidetes   | <i>Phocaeicola</i>          | 0,08                   | 0,00  | 0,00  | 0,00  | 0,00  | 0,00  | 0,00 | 0,00  | 0,00  | 0,04  | 0,00 | 0,00 |
| Bacteroidetes   | <i>Barnesiella</i>          | 17,07                  | 9,82  | 20,03 | 13,21 | 10,52 | 13,45 | 1,44 | 1,36  | 14,30 | 11,22 | 1,44 | 0,70 |
| Bacteroidetes   | <i>unclassified</i>         | 43,22                  | 33,09 | 22,92 | 27,28 | 27,01 | 24,90 | 4,64 | 12,82 | 34,65 | 26,66 | 5,53 | 8,85 |
| Bacteroidetes   | <i>unclassified</i>         | 0,31                   | 0,19  | 0,00  | 0,04  | 0,16  | 0,04  | 0,00 | 0,04  | 0,16  | 0,08  | 0,00 | 0,16 |
| Bacteroidetes   | <i>unclassified</i>         | 0,19                   | 0,23  | 0,00  | 0,00  | 0,04  | 0,04  | 0,04 | 0,00  | 0,00  | 0,04  | 0,04 | 0,00 |
| Firmicutes      | <i>Bacillus</i>             | 0,00                   | 0,00  | 0,00  | 0,00  | 0,00  | 0,00  | 0,00 | 0,00  | 0,00  | 0,00  | 0,00 | 0,08 |
| Firmicutes      | <i>Staphylococcus</i>       | 0,00                   | 0,00  | 0,00  | 0,00  | 0,00  | 0,00  | 0,00 | 0,00  | 0,00  | 0,00  | 0,04 | 0,00 |
| Firmicutes      | <i>Melissococcus</i>        | 0,00                   | 0,00  | 0,04  | 0,00  | 0,00  | 0,00  | 0,00 | 0,00  | 0,00  | 0,00  | 0,00 | 0,00 |
| Firmicutes      | <i>Lactobacillus</i>        | 1,71                   | 2,30  | 2,49  | 2,96  | 8,46  | 6,12  | 1,05 | 0,31  | 2,65  | 1,79  | 1,33 | 0,12 |
| Firmicutes      | <i>unclassified</i>         | 0,00                   | 0,00  | 0,04  | 0,00  | 0,00  | 0,00  | 0,00 | 0,00  | 0,00  | 0,08  | 0,00 | 0,00 |
| Firmicutes      | <i>Turicibacter</i>         | 3,66                   | 2,34  | 0,94  | 3,55  | 10,17 | 4,29  | 0,31 | 0,04  | 4,83  | 4,56  | 0,00 | 0,00 |
| Firmicutes      | <i>unclassified</i>         | 0,04                   | 0,00  | 0,00  | 0,00  | 0,00  | 0,00  | 0,00 | 0,00  | 0,00  | 0,00  | 0,00 | 0,00 |
| Firmicutes      | <i>unclassified</i>         | 0,00                   | 0,16  | 0,47  | 0,74  | 0,39  | 0,12  | 0,12 | 0,12  | 0,58  | 0,51  | 0,58 | 0,90 |
| Firmicutes      | <i>Clostridium</i>          | 0,00                   | 0,00  | 0,04  | 0,04  | 0,12  | 0,35  | 1,75 | 0,19  | 0,12  | 0,00  | 0,00 | 0,00 |
| Firmicutes      | <i>Acidaminobacter</i>      | 0,00                   | 0,00  | 0,00  | 0,00  | 0,00  | 0,00  | 0,00 | 0,00  | 0,00  | 0,00  | 0,00 | 0,00 |
| Firmicutes      | <i>Anaerovorax</i>          | 0,00                   | 0,00  | 0,00  | 0,00  | 0,00  | 0,00  | 0,00 | 0,00  | 0,00  | 0,00  | 0,00 | 0,00 |
| Firmicutes      | <i>Eubacterium</i>          | 0,82                   | 2,38  | 1,29  | 1,05  | 2,14  | 0,23  | 0,19 | 0,35  | 0,08  | 5,81  | 0,19 | 0,27 |
| Firmicutes      | <i>Dehalobacterium</i>      | 0,00                   | 0,00  | 0,16  | 0,12  | 0,12  | 0,00  | 0,00 | 0,12  | 0,19  | 0,00  | 0,08 | 0,16 |
| Firmicutes      | <i>Eubacterium</i>          | 0,16                   | 0,19  | 0,04  | 0,12  | 0,27  | 0,19  | 0,16 | 2,49  | 0,12  | 0,00  | 0,39 | 1,17 |
| Firmicutes      | <i>Anaerostipes</i>         | 0,00                   | 0,00  | 0,16  | 0,12  | 0,00  | 0,16  | 0,04 | 0,00  | 0,12  | 0,00  | 0,00 | 0,00 |
| Firmicutes      | <i>Bacteroides</i>          | 0,08                   | 0,08  | 0,19  | 0,08  | 0,00  | 0,00  | 0,00 | 0,00  | 0,04  | 0,08  | 0,00 | 0,00 |



|                 |                             |      |      |      |      |      |      |       |      |      |      |       |       |
|-----------------|-----------------------------|------|------|------|------|------|------|-------|------|------|------|-------|-------|
| Firmicutes      | <i>Oscillibacter</i>        | 0,66 | 1,71 | 2,49 | 2,92 | 0,78 | 1,05 | 2,49  | 3,86 | 1,87 | 2,34 | 4,48  | 3,12  |
| Firmicutes      | <i>Oscillospira</i>         | 0,94 | 1,05 | 1,75 | 1,64 | 1,75 | 1,64 | 1,17  | 1,56 | 0,82 | 1,13 | 1,29  | 1,99  |
| Firmicutes      | <i>Papillibacter</i>        | 0,00 | 0,00 | 0,00 | 0,00 | 0,08 | 0,00 | 0,00  | 0,04 | 0,00 | 0,00 | 0,19  | 0,00  |
| Firmicutes      | <i>Pseudoflavonifractor</i> | 0,27 | 1,17 | 0,74 | 1,25 | 1,05 | 0,62 | 1,29  | 1,68 | 0,94 | 0,35 | 2,26  | 1,44  |
| Firmicutes      | <i>Ruminococcus</i>         | 0,04 | 0,04 | 0,47 | 0,39 | 0,19 | 0,16 | 0,19  | 0,04 | 0,39 | 0,16 | 0,04  | 0,00  |
| Firmicutes      | <i>Sporobacter</i>          | 0,00 | 0,00 | 0,00 | 0,00 | 0,00 | 0,00 | 0,00  | 0,00 | 0,08 | 0,00 | 0,00  | 0,00  |
| Firmicutes      | unclassified*               | 0,82 | 1,33 | 1,21 | 1,01 | 0,47 | 0,66 | 0,66  | 1,48 | 0,94 | 0,82 | 2,22  | 1,75  |
| Firmicutes      | unclassified*               | 0,43 | 1,56 | 1,60 | 0,94 | 0,62 | 0,31 | 1,91  | 4,60 | 0,86 | 1,09 | 2,18  | 1,75  |
| Firmicutes      | unclassified*               | 0,04 | 0,04 | 0,12 | 0,16 | 0,00 | 0,16 | 0,04  | 0,08 | 0,08 | 0,00 | 0,00  | 0,00  |
| Firmicutes      | unclassified*               | 1,05 | 0,51 | 0,23 | 0,70 | 2,49 | 1,17 | 0,04  | 0,08 | 1,01 | 0,90 | 0,19  | 0,12  |
| Proteobacteria  | <i>Methylobacterium</i>     | 0,00 | 0,00 | 0,00 | 0,04 | 0,00 | 0,00 | 0,00  | 0,00 | 0,00 | 0,00 | 0,04  | 0,00  |
| Proteobacteria  | <i>Enterobacter</i>         | 0,00 | 0,00 | 0,00 | 0,00 | 0,00 | 0,08 | 0,00  | 0,00 | 0,00 | 0,00 | 0,00  | 0,39  |
| Proteobacteria  | unclassified*               | 0,00 | 0,00 | 0,00 | 0,00 | 0,00 | 0,00 | 0,00  | 0,00 | 0,00 | 0,00 | 0,00  | 0,08  |
| Proteobacteria  | <i>Acinetobacter</i>        | 0,00 | 0,00 | 0,00 | 0,00 | 0,00 | 0,00 | 0,00  | 0,00 | 0,00 | 0,00 | 0,00  | 0,00  |
| Proteobacteria  | <i>Pseudomonas</i>          | 0,00 | 0,00 | 0,00 | 0,00 | 0,00 | 0,00 | 0,00  | 0,00 | 0,00 | 0,00 | 0,00  | 0,04  |
| Tenericutes     | <i>Allobaculum</i>          | 0,04 | 0,00 | 0,08 | 0,04 | 0,00 | 0,08 | 12,12 | 3,51 | 0,04 | 0,00 | 0,00  | 0,00  |
| Tenericutes     | <i>Clostridium</i>          | 0,00 | 0,00 | 0,00 | 0,00 | 0,00 | 0,00 | 0,08  | 0,00 | 0,04 | 0,00 | 0,00  | 0,00  |
| Tenericutes     | <i>Coprobacillus</i>        | 0,00 | 0,00 | 0,00 | 0,00 | 0,00 | 0,00 | 0,04  | 0,00 | 0,00 | 0,00 | 0,08  | 0,00  |
| Tenericutes     | unclassified*               | 0,04 | 0,00 | 0,00 | 0,04 | 0,04 | 0,08 | 0,12  | 0,00 | 0,12 | 0,04 | 0,00  | 0,08  |
| Tenericutes     | <i>Anaeroplasma</i>         | 0,08 | 1,01 | 1,21 | 0,74 | 0,08 | 0,27 | 0,04  | 0,00 | 0,39 | 0,47 | 0,04  | 0,00  |
| Tenericutes     | unclassified*               | 0,90 | 0,78 | 0,97 | 1,13 | 0,47 | 2,03 | 0,27  | 0,43 | 1,48 | 0,27 | 0,04  | 0,04  |
| Verrucomicrobia | <i>Akkermansia</i>          | 1,09 | 4,56 | 0,78 | 0,19 | 3,27 | 5,03 | 10,64 | 7,76 | 3,08 | 1,44 | 21,51 | 30,16 |
| unclassified    | unclassified                | 0,43 | 0,70 | 0,70 | 0,23 | 0,94 | 0,58 | 0,55  | 0,39 | 0,55 | 0,94 | 0,35  | 0,27  |

<sup>a</sup>Taxa marked with asterisk could not be assigned to any of the genera and are shown at the lowest common taxon

**Table S2. Proportion of sequences assigned to a given bacterial genus in metagenomic samples between week 1 and 9 for Chow, HFHS and CE treatments**

| Treatment | Genus*                                   | Proportion (%) |        |
|-----------|------------------------------------------|----------------|--------|
|           |                                          | Week 1         | Week 9 |
| Chow      | Unclassified <i>Porphyromonadaceae</i> * | 43,2           | 27,2   |
|           | Unclassified <i>Lachnospiraceae</i> *    | 12,3           | 16,8   |
|           | <i>Clostridium</i>                       | 8,7            | 12,9   |
|           | <i>Barnesiella</i>                       | 17,1           | 13,3   |
|           | <i>Oscillibacter</i>                     | 3,1            | 6,8    |
|           | <i>Acetivibrio</i>                       | 0,5            | 1,9    |
|           | <i>Lactobacillus</i>                     | 1,7            | 3,0    |
|           | <i>Pseudoflavonifractor</i>              | 0,2            | 1,2    |
| HFHS      | <i>Oscillibacter</i>                     | 2,5            | 25,4   |
|           | Unclassified <i>Porphyromonadaceae</i> * | 27,0           | 12,9   |
|           | <i>Turicibacter</i>                      | 10,0           | 0,04   |
|           | <i>Barnesiella</i>                       | 10,4           | 1,3    |
|           | <i>Lactobacillus</i>                     | 8,5            | 0,3    |
|           | <i>Akkermansia</i>                       | 3,3            | 7,8    |
|           | Unclassified <i>Clostridiales</i> *      | 0,5            | 4,8    |
|           | <i>Allobaculum</i>                       | 0,0            | 3,5    |
|           | <i>Ruminococcus</i>                      | 0,4            | 3,7    |
|           | <i>Clostridium</i>                       | 10,1           | 13,3   |
|           | Unclassified <i>Firmicutes</i> *         | 2,6            | 0,1    |
| CE        | <i>Akkermansia</i>                       | 3,1            | 30,2   |
|           | Unclassified <i>Porphyromonadaceae</i> * | 34,6           | 8,9    |
|           | <i>Oscillibacter</i>                     | 3,9            | 18,0   |
|           | <i>Barnesiella</i>                       | 14,3           | 0,7    |
|           | <i>Turicibacter</i>                      | 4,7            | 0      |
|           | <i>Ruminococcus</i>                      | 0,5            | 3,5    |
|           | <i>Lactobacillus</i>                     | 2,7            | 0,1    |
|           | <i>Acetivibrio</i>                       | 2,1            | 0,1    |
|           | Unclassified RF39 ( <i>Mollicutes</i> )* | 1,5            | 0,04   |
|           | <i>Eubacterium</i>                       | 0,2            | 1,4    |
|           | Unclassified <i>Firmicutes</i> *         | 1,3            | 0,1    |
|           | <i>Oscillospira</i>                      | 0,8            | 2,0    |

\*Taxa marked with asterisk could not be assigned to any of the genera and are shown at the lowest common taxon

**Table S3. Primer Sequences**

| Gene  | Forward sequence      | Reverse sequence          |
|-------|-----------------------|---------------------------|
| Hprt  | CCCCAAAATGGTTAAGGTTGC | AACAAAGTCTGGCCTGTATCC     |
| Muc2  | ACGTGTCATATTTGCACCTCT | TCAACATTGAGAGTGCCAACT     |
| Klf4  | GTAGTGCCTGGTCAGTTCATC | AACCTATACCAAGAGTTCTCATCTC |
| Reg3g | TTCCTGTCCTCCATGATCAAA | CATCCACCTCTGTTGGGTTTC     |
